# Supplementary material for: Overexpression of RBM15 modulated the effect of trophoblast cells by promoting the binding ability between YTHDF2 and the CD82 3′UTR to decrease the expression of CD82
Source: PubMed Central journal article supplement (PMC11098837; doi:10.1016/j.heliyon.2024.e30702), 2024-05-03
Supplement: mmc2.pdf [file mmc2.pdf]

**RAW DATA**

# Figure 3A

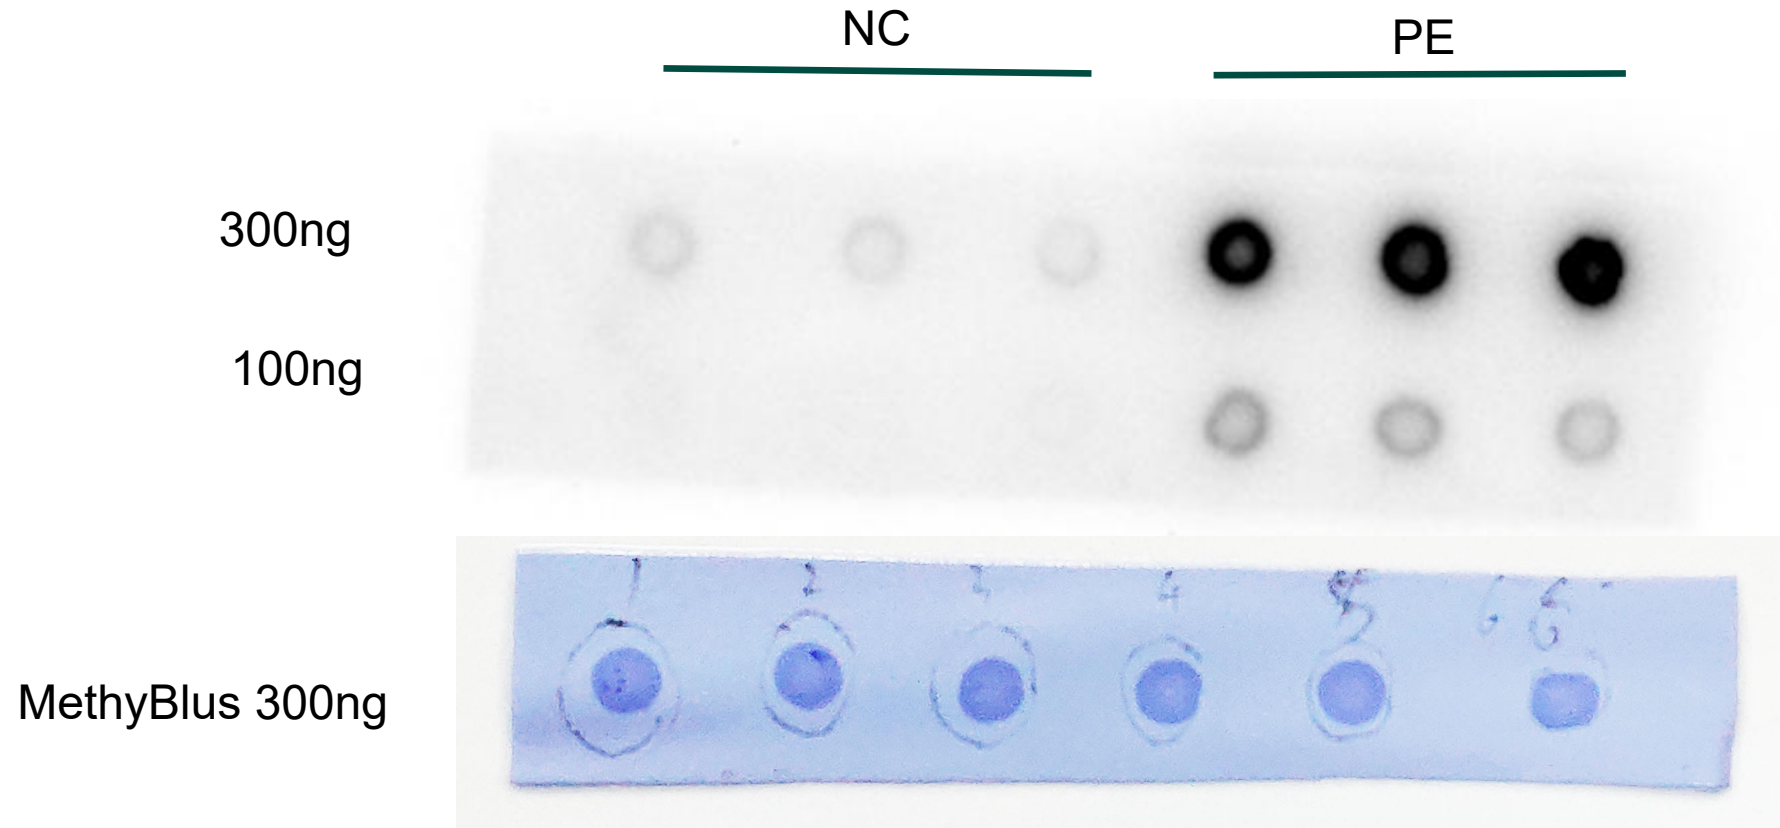

| name                          | brand       | CAT        | dilution | species |
|-------------------------------|-------------|------------|----------|---------|
| anti-m6A antibody             | proteintech | 68055-1-Ig | 1:2000   | MS      |
| Goat anti-Mouse IgG (H&L)-HRP | proteintech | PR30012    | 1:2000   |         |

# Figure 3C

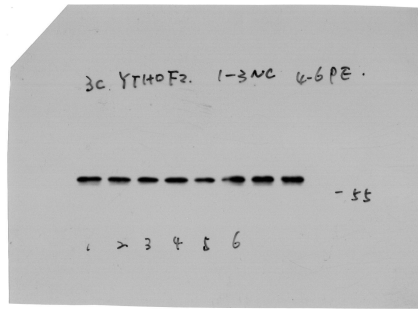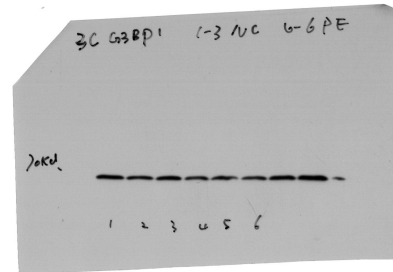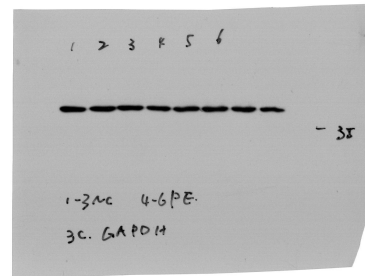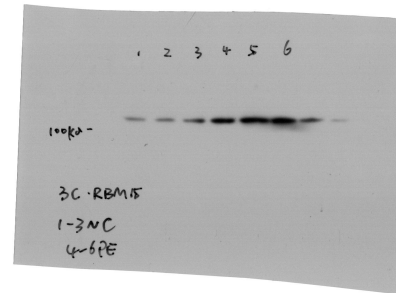

| name                           | brand       | CAT        | Mol. wt.    | dilution | species |
|--------------------------------|-------------|------------|-------------|----------|---------|
| RBM15 Polyclonal antibody      | proteintech | 10587-1-AP | 100-107 kDa | 1:4000   | RB      |
| G3BP1 Polyclonal antibody      | proteintech | 13057-2-AP | 68 kDa      | 1:8000   | RB      |
| YTHDF2 Polyclonal antibody     | proteintech | 24744-1-AP | 62 kDa      | 1:5000   | RB      |
| GAPDH Polyclonal antibody      | proteintech | 10494-1-AP | 36 kDa      | 1:20000  | RB      |
| Goat anti-Rabbit IgG (H&L)-HRP | proteintech | PR30011    | NO          | 1:20000  |         |

# Figure 4B

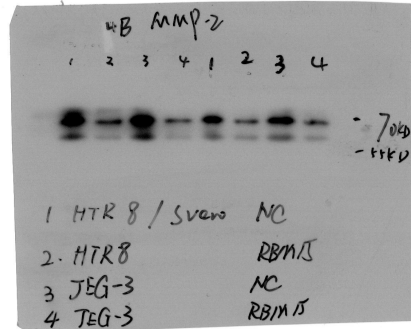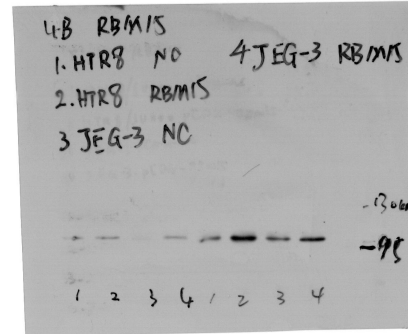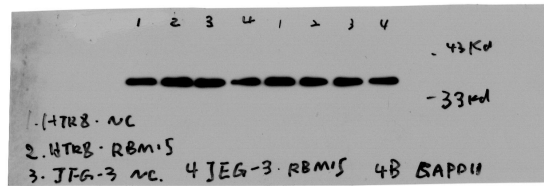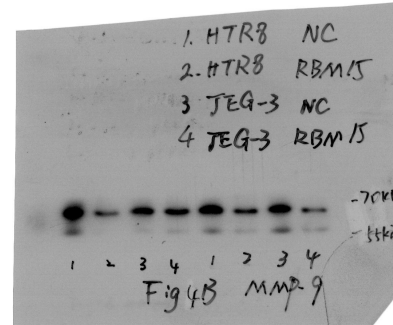

| name                                  | brand       | CAT        | Mol. wt.    | dilution | species |
|---------------------------------------|-------------|------------|-------------|----------|---------|
| RBM15 Polyclonal antibody             | proteintech | 10587-1-AP | 100-107 kDa | 1:4000   | RB      |
| MMP2 Polyclonal antibody              | proteintech | 10373-2-AP | 62-72 kDa   | 1:500    | RB      |
| MMP9 (N-terminal) Polyclonal antibody | proteintech | 10375-2-AP | 67 kDa      | 1:1000   | RB      |
| GAPDH Polyclonal antibody             | proteintech | 10494-1-AP | 36 kDa      | 1:20000  | RB      |
| Goat anti-Rabbit IgG (H&L)-HRP        | proteintech | PR30011    | NO          | 1:20000  |         |

# Figure 4C

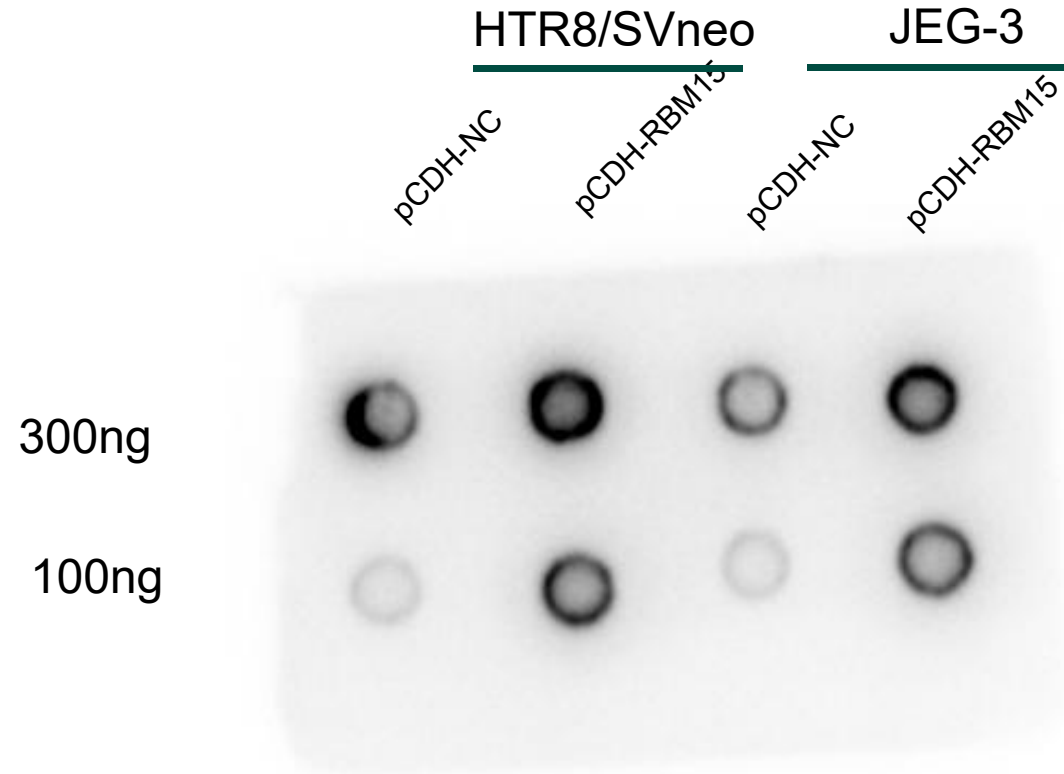

| name                          | brand       | CAT        | dilution | species |
|-------------------------------|-------------|------------|----------|---------|
| anti-m6A antibody             | proteintech | 68055-1-Ig | 1:2000   | MS      |
| Goat anti-Mouse IgG (H&L)-HRP | proteintech | PR30012    | 1:2000   |         |

MethyBlus 300ng

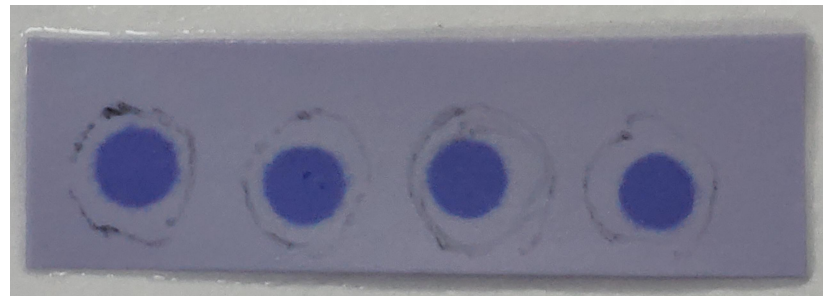

# Figure 9B

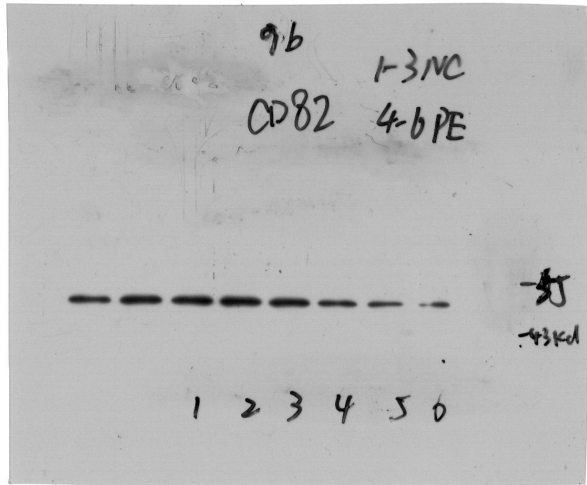

| name                           | brand       | CAT        | Mol. wt. | dilution | species |
|--------------------------------|-------------|------------|----------|----------|---------|
| GAPDH Polyclonal antibody      | proteintech | 10494-1-AP | 36 kDa   | 1:20000  | RB      |
| CD82 Monoclonal antibody       | proteintech | 66803-1-Ig | 48 kDa   | 1:3000   | MS      |
| Goat anti-Mouse IgG (H&L)-HRP  | proteintech | PR30012    | NO       | 1:20000  |         |
| Goat anti-Rabbit IgG (H&L)-HRP | proteintech | PR30011    | NO       | 1:20000  |         |

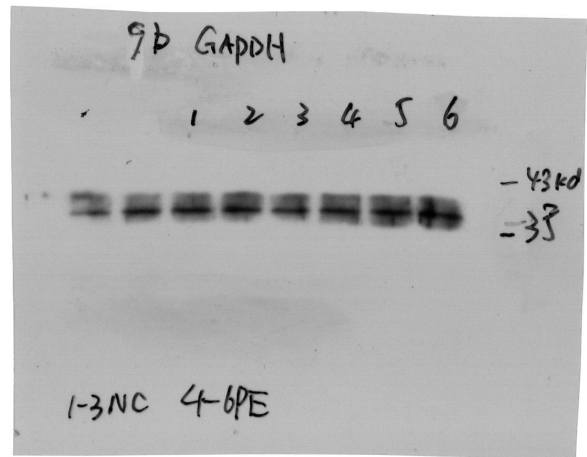

# Figure 9E

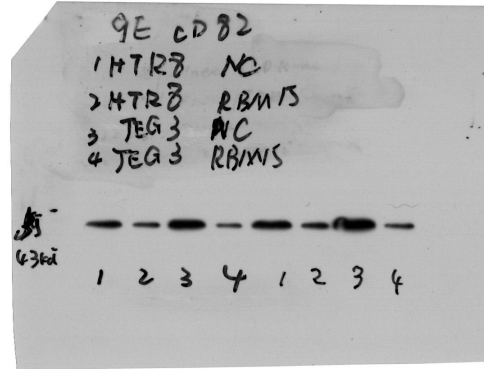

| name                           | brand       | CAT        | Mol. wt. | dilution | species |
|--------------------------------|-------------|------------|----------|----------|---------|
| GAPDH Polyclonal antibody      | proteintech | 10494-1-AP | 36 kDa   | 1:20000  | RB      |
| CD82 Monoclonal antibody       | proteintech | 66803-1-Ig | 48 kDa   | 1:3000   | MS      |
| Goat anti-Mouse IgG (H&L)-HRP  | proteintech | PR30012    | NO       | 1:20000  |         |
| Goat anti-Rabbit IgG (H&L)-HRP | proteintech | PR30011    | NO       | 1:20000  |         |

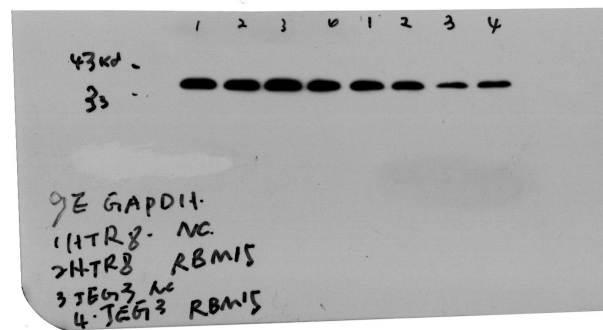

# Figure 10B

## HTR8/SVneo

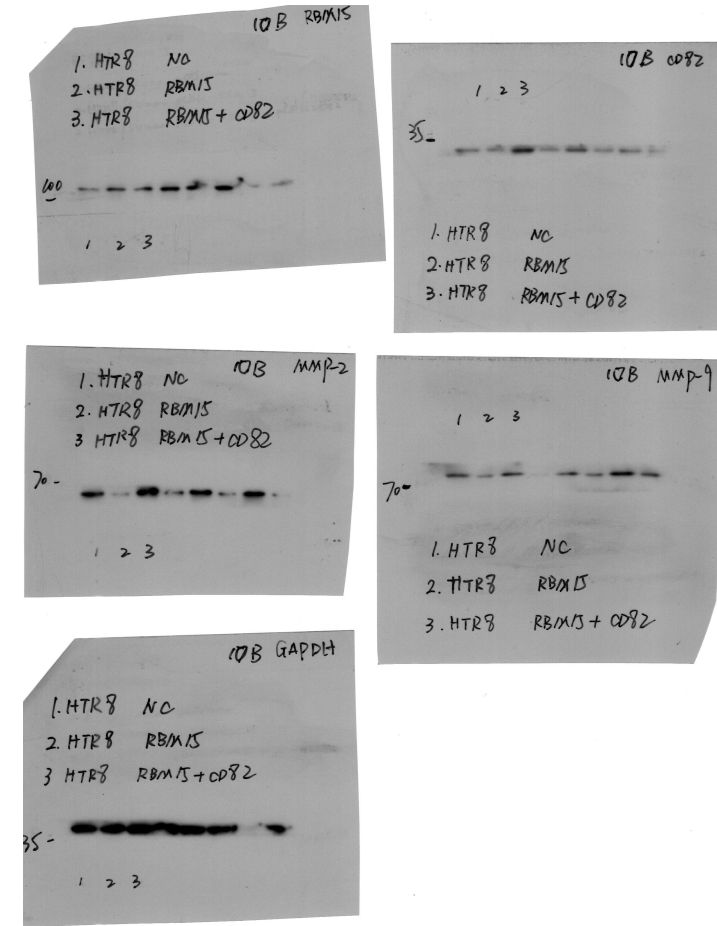

## JEG-3

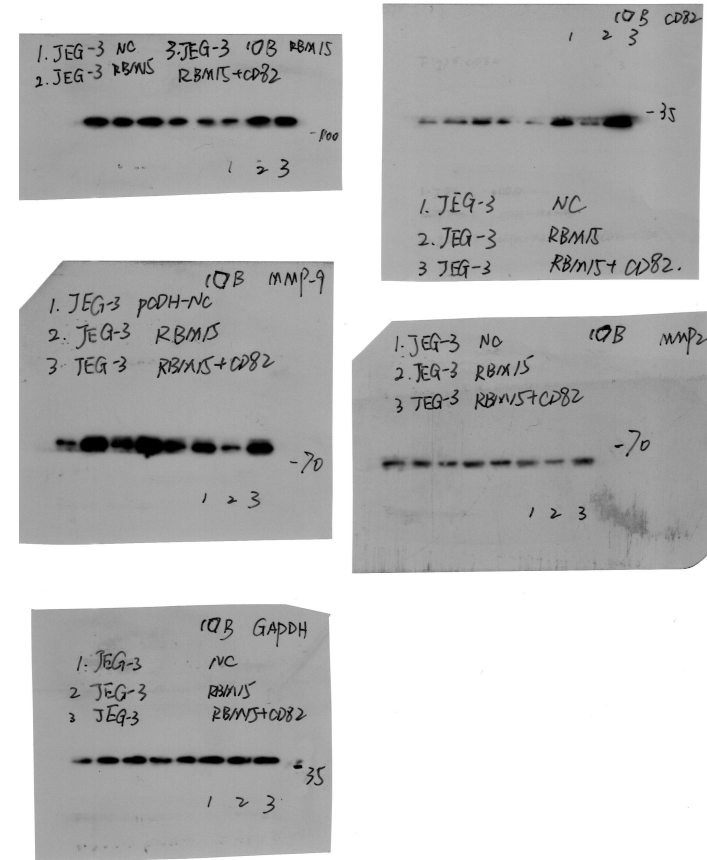

| name                                  | brand       | CAT        | Mol. wt.    | dilution | species |
|---------------------------------------|-------------|------------|-------------|----------|---------|
| RBM15 Polyclonal antibody             | proteintech | 10587-1-AP | 100-107 kDa | 1:4000   | RB      |
| MMP2 Polyclonal antibody              | proteintech | 10373-2-AP | 62-72 kDa   | 1:500    | RB      |
| MMP9 (N-terminal) Polyclonal antibody | proteintech | 10375-2-AP | 67 kDa      | 1:1000   | RB      |
| GAPDH Polyclonal antibody             | proteintech | 10494-1-AP | 36 kDa      | 1:20000  | RB      |
| CD82 Monoclonal antibody              | proteintech | 66803-1-Ig | 48 kDa      | 1:3000   | MS      |
| Goat anti-Mouse IgG (H&L)-HRP         | proteintech | PR30012    | NO          | 1:20000  |         |
| Goat anti-Rabbit IgG (H&L)-HRP        | proteintech | PR30011    | NO          | 1:20000  |         |
